# Supplementary material for: Multicomponent Synthesis of 3,6-Dihydro-2H-1,3-thiazine-2-thiones
Source: Molecules. 2012 Feb 8;17(2):1675–85. doi: 10.3390/molecules17021675 (PMC6268911; doi:10.3390/molecules17021675)
Supplement: Supplementary file 1 [file molecules-17-01675-s001.cif]

  
data_anass3m 
  
_audit_creation_method            SHELXL-97 
_chemical_name_systematic 
; 
 ? 
; 
#------------------------------------------------------------------------------ 
_publ_requested_journal               ' ENTER JOURNAL NAME HERE' 
  
_publ_contact_author 
; 
    Madeleine Helliwell 
; 
_publ_contact_letter 
; 
    ENTER TEXT OF LETTER 
; 
  
_publ_requested_coeditor_name          ? 
_publ_contact_author_phone            ' ENTER PHONE NUMBER ' 
_publ_contact_author_fax              ' ENTER FAX NUMBER ' 
_publ_contact_author_email            ' ENTER EMAIL ADDRESS ' 
loop_ 
_publ_author_name 
_publ_author_address 
' FIRST AUTHORS NAME ' 
; 
  FIRST AUTHORS ADDRESS 
; 
  
_publ_section_title 
; 
    ENTER SECTION TITLE 
; 
  
_publ_section_abstract 
; 
    ENTER ABSTRACT 
; 
  
_publ_section_exptl_prep 
; 
    ENTER EXPERIMENTAL SECTION 
; 
  
_publ_section_exptl_refinement 
; 
  
The structure was solved by the direct methods. 
All non-H atoms were refined anisotropically. 
H atoms bonded to C were included in calculated positions;
those bonded to N were found by difference Fourier methods 
and refined isotropically. 

  
  
  
; 
  
_publ_section_comment 
; 
    ENTER TEXT 
; 
  
_publ_section_references 
; 
Bruker (2001). <i>SMART</i> (Version 5.625), <i>SADABS</i> (Version 2.03a) and
<i>SHELXTL</i> (Version 6.12). Bruker AXS Inc., Madison, Wisconsin, USA.

Bruker (2002). <i>SAINT</i>. Version 6.36a. Bruker AXS Inc., Madison,
Wisconsin, USA.

M. C. Burla, R. Caliandro, M. Camalli, B. Carrozzini, 
 G. L. Cascarano, L. De Caro,C. Giacovazzo, G. Polidori 
 and R. Spagna 
 SIR2004: an improved tool for crystal structure determination 
 and refinement 
 J. Appl. Cryst. (2005). 38, 381-388 

Sheldrick, G. M. (1997). SHELXS-97 and SHELXL-97.
University of G\"ottingen, Germany.

Sheldrick, G, M. (2005). CELL_NOW. University
of G\"ottingen, Germany.

Sheldrick, G, M. (2007). TWINABS. University
of G\"ottingen, Germany.

Spek, A.L. (2003) J.Appl.Cryst. 36, 2003, 7-13. 

  
; 
  
_publ_section_acknowledgements 
; 
    ENTER ACKNOWLEDGEMENTS 
; 
  
_publ_section_table_legends 
; 
    ENTER TABLE LEGENDS 
; 
  
_publ_section_figure_captions 
; 
    ENTER FIGURE CAPTIONS 
;
_chemical_name_common             ? 
_chemical_melting_point           ? 
_chemical_formula_moiety       'C16 H13 N S2'
_chemical_formula_sum 
 'C16 H13 N S2' 
_chemical_formula_weight          283.39 
  
loop_ 
 _atom_type_symbol 
 _atom_type_description 
 _atom_type_scat_dispersion_real 
 _atom_type_scat_dispersion_imag 
 _atom_type_scat_source 
 'C'  'C'   0.0033   0.0016 
 'International Tables Vol C Tables 4.2.6.8 and 6.1.1.4' 
 'H'  'H'   0.0000   0.0000 
 'International Tables Vol C Tables 4.2.6.8 and 6.1.1.4' 
 'N'  'N'   0.0061   0.0033 
 'International Tables Vol C Tables 4.2.6.8 and 6.1.1.4' 
 'S'  'S'   0.1246   0.1234 
 'International Tables Vol C Tables 4.2.6.8 and 6.1.1.4' 
  
_symmetry_cell_setting            Monoclinic 
_symmetry_space_group_name_H-M    P2(1)/n 
_symmetry_space_group_name_Hall -P2yn 
  
loop_ 
 _symmetry_equiv_pos_as_xyz 
 'x, y, z' 
 '-x+1/2, y+1/2, -z+1/2' 
 '-x, -y, -z' 
 'x-1/2, -y-1/2, z-1/2' 
  
_cell_length_a                    9.5616(17) 
_cell_length_b                    9.1731(16) 
_cell_length_c                    15.889(3) 
_cell_angle_alpha                 90.00 
_cell_angle_beta                  92.058(3) 
_cell_angle_gamma                 90.00 
_cell_volume                      1392.7(4) 
_cell_formula_units_Z             4 
_cell_measurement_temperature     100(2) 
_cell_measurement_reflns_used     915 
_cell_measurement_theta_min       2.45 
_cell_measurement_theta_max       26.36 
  
_exptl_crystal_description        prismatic 
_exptl_crystal_colour             colourless 
_exptl_crystal_size_max           0.40 
_exptl_crystal_size_mid           0.35 
_exptl_crystal_size_min           0.30 
_exptl_crystal_density_meas      ? 
_exptl_crystal_density_diffrn     1.352 
_exptl_crystal_density_method     'not measured' 
_exptl_crystal_F_000              592 
_exptl_absorpt_coefficient_mu     0.366 
_exptl_absorpt_correction_type    none 
_exptl_absorpt_correction_T_min   ? 
_exptl_absorpt_correction_T_max   ?
_exptl_absorpt_process_details    ? 
  
_exptl_special_details 
; 
 ? 
; 
  
_diffrn_ambient_temperature       100(2) 
_diffrn_radiation_wavelength      0.71073 
_diffrn_radiation_type            MoK\a 
_diffrn_radiation_source          'fine-focus sealed tube' 
_diffrn_radiation_monochromator   graphite 
_diffrn_measurement_device_type   'CCD area detector' 
_diffrn_measurement_method        'phi and omega scans' 
_diffrn_detector_area_resol_mean  ? 
_diffrn_standards_number          ? 
_diffrn_standards_interval_count  ? 
_diffrn_standards_interval_time   ? 
_diffrn_standards_decay_%         ? 
_diffrn_reflns_number             10816 
_diffrn_reflns_av_R_equivalents   0.0378 
_diffrn_reflns_av_sigmaI/netI     0.0289 
_diffrn_reflns_limit_h_min        -11 
_diffrn_reflns_limit_h_max        11 
_diffrn_reflns_limit_k_min        -11 
_diffrn_reflns_limit_k_max        11 
_diffrn_reflns_limit_l_min        -19 
_diffrn_reflns_limit_l_max        19 
_diffrn_reflns_theta_min          2.45 
_diffrn_reflns_theta_max          26.44 
_reflns_number_total              2859 
_reflns_number_gt                 2616 
_reflns_threshold_expression      >2sigma(I) 
  
_computing_data_collection        'Bruker SMART' 
_computing_cell_refinement        'Bruker SMART' 
_computing_data_reduction         'Bruker SAINT' 
_computing_structure_solution     'SHELXS-97 (Sheldrick, 1990)' 
_computing_structure_refinement   'SHELXL-97 (Sheldrick, 1997)' 
_computing_molecular_graphics     'Bruker SHELXTL' 
_computing_publication_material   'Bruker SHELXTL' 
  
_refine_special_details 
; 
 Refinement of F^2^ against ALL reflections.  The weighted R-factor wR and 
 goodness of fit S are based on F^2^, conventional R-factors R are based 
 on F, with F set to zero for negative F^2^. The threshold expression of 
 F^2^ > 2sigma(F^2^) is used only for calculating R-factors(gt) etc. and is 
 not relevant to the choice of reflections for refinement.  R-factors based 
 on F^2^ are statistically about twice as large as those based on F, and R- 
 factors based on ALL data will be even larger. 
; 
  
_refine_ls_structure_factor_coef  Fsqd 
_refine_ls_matrix_type            full 
_refine_ls_weighting_scheme       calc 
_refine_ls_weighting_details 
 'calc w=1/[\s^2^(Fo^2^)+(0.0441P)^2^+0.3687P] where P=(Fo^2^+2Fc^2^)/3' 
_atom_sites_solution_primary      direct 
_atom_sites_solution_secondary    difmap 
_atom_sites_solution_hydrogens    geom 
_refine_ls_hydrogen_treatment     mixed 
_refine_ls_extinction_method      none 
_refine_ls_extinction_coef        ? 
_refine_ls_number_reflns          2859 
_refine_ls_number_parameters      176 
_refine_ls_number_restraints      0 
_refine_ls_R_factor_all           0.0351 
_refine_ls_R_factor_gt            0.0313 
_refine_ls_wR_factor_ref          0.0805 
_refine_ls_wR_factor_gt           0.0786 
_refine_ls_goodness_of_fit_ref    1.044 
_refine_ls_restrained_S_all       1.044 
_refine_ls_shift/su_max           0.002 
_refine_ls_shift/su_mean          0.000 
  
loop_ 
 _atom_site_label 
 _atom_site_type_symbol 
 _atom_site_fract_x 
 _atom_site_fract_y 
 _atom_site_fract_z 
 _atom_site_U_iso_or_equiv 
 _atom_site_adp_type 
 _atom_site_occupancy 
 _atom_site_symmetry_multiplicity 
 _atom_site_calc_flag 
 _atom_site_refinement_flags 
 _atom_site_disorder_assembly 
 _atom_site_disorder_group 
S1 S 0.69515(4) 0.68521(4) 1.14748(2) 0.01774(11) Uani 1 1 d . . . 
S2 S 0.96911(4) 0.55263(4) 1.12932(2) 0.01869(11) Uani 1 1 d . . . 
N1 N 0.78932(12) 0.59997(13) 1.00010(7) 0.0160(3) Uani 1 1 d . . . 
H1N H 0.853(2) 0.5610(18) 0.9693(11) 0.024(5) Uiso 1 1 d . . . 
C1 C 0.81952(14) 0.61174(15) 1.08305(9) 0.0159(3) Uani 1 1 d . . . 
C2 C 0.59810(14) 0.80371(15) 1.07228(9) 0.0176(3) Uani 1 1 d . . . 
H2 H 0.5070 0.8288 1.0976 0.021 Uiso 1 1 calc R . . 
C3 C 0.56599(15) 0.71901(16) 0.99371(9) 0.0173(3) Uani 1 1 d . . . 
H3 H 0.4757 0.7286 0.9673 0.021 Uiso 1 1 calc R . . 
C4 C 0.65844(14) 0.63022(15) 0.95882(9) 0.0162(3) Uani 1 1 d . . . 
C5 C 0.67803(14) 0.94509(15) 1.06082(9) 0.0167(3) Uani 1 1 d . . . 
C6 C 0.74668(16) 0.97603(16) 0.98698(9) 0.0213(3) Uani 1 1 d . . . 
H6 H 0.7398 0.9100 0.9410 0.026 Uiso 1 1 calc R . . 
C7 C 0.82495(17) 1.10251(17) 0.98021(10) 0.0244(3) Uani 1 1 d . . . 
H7 H 0.8723 1.1220 0.9299 0.029 Uiso 1 1 calc R . . 
C8 C 0.83443(15) 1.20059(16) 1.04652(9) 0.0209(3) Uani 1 1 d . . . 
H8 H 0.8886 1.2869 1.0419 0.025 Uiso 1 1 calc R . . 
C9 C 0.76444(16) 1.17206(16) 1.11971(9) 0.0206(3) Uani 1 1 d . . . 
H9 H 0.7693 1.2398 1.1650 0.025 Uiso 1 1 calc R . . 
C10 C 0.68749(15) 1.04519(16) 1.12699(9) 0.0192(3) Uani 1 1 d . . . 
H10 H 0.6406 1.0260 1.1775 0.023 Uiso 1 1 calc R . . 
C11 C 0.63404(14) 0.55695(15) 0.87658(9) 0.0166(3) Uani 1 1 d . . . 
C12 C 0.55876(15) 0.62852(16) 0.81139(9) 0.0192(3) Uani 1 1 d . . . 
H12 H 0.5263 0.7252 0.8196 0.023 Uiso 1 1 calc R . . 
C13 C 0.53136(15) 0.55930(17) 0.73513(9) 0.0227(3) Uani 1 1 d . . . 
H13 H 0.4784 0.6077 0.6918 0.027 Uiso 1 1 calc R . . 
C14 C 0.58121(15) 0.41925(18) 0.72184(9) 0.0230(3) Uani 1 1 d . . . 
H14 H 0.5628 0.3722 0.6693 0.028 Uiso 1 1 calc R . . 
C15 C 0.65784(15) 0.34805(17) 0.78524(9) 0.0210(3) Uani 1 1 d . . . 
H15 H 0.6933 0.2529 0.7759 0.025 Uiso 1 1 calc R . . 
C16 C 0.68264(14) 0.41601(16) 0.86235(9) 0.0177(3) Uani 1 1 d . . . 
H16 H 0.7333 0.3659 0.9060 0.021 Uiso 1 1 calc R . . 
  
loop_ 
 _atom_site_aniso_label 
 _atom_site_aniso_U_11 
 _atom_site_aniso_U_22 
 _atom_site_aniso_U_33 
 _atom_site_aniso_U_23 
 _atom_site_aniso_U_13 
 _atom_site_aniso_U_12 
S1 0.0178(2) 0.0194(2) 0.01627(19) 0.00174(13) 0.00341(14) 0.00180(13) 
S2 0.01534(19) 0.0232(2) 0.01726(19) -0.00267(14) -0.00263(14) 0.00208(13) 
N1 0.0116(6) 0.0197(6) 0.0165(6) -0.0024(5) 0.0007(5) 0.0003(5) 
C1 0.0145(7) 0.0137(7) 0.0194(7) 0.0001(5) 0.0016(5) -0.0029(5) 
C2 0.0133(7) 0.0193(7) 0.0202(7) 0.0021(6) 0.0024(6) 0.0032(5) 
C3 0.0131(7) 0.0187(7) 0.0201(7) 0.0020(6) -0.0006(5) -0.0010(5) 
C4 0.0137(7) 0.0163(7) 0.0185(7) 0.0034(5) -0.0015(5) -0.0029(5) 
C5 0.0134(7) 0.0178(7) 0.0189(7) 0.0017(5) -0.0006(5) 0.0036(5) 
C6 0.0263(8) 0.0185(7) 0.0194(7) -0.0026(6) 0.0045(6) -0.0002(6) 
C7 0.0285(9) 0.0221(8) 0.0230(8) 0.0022(6) 0.0071(6) -0.0002(6) 
C8 0.0190(7) 0.0177(7) 0.0258(8) 0.0023(6) -0.0038(6) -0.0007(6) 
C9 0.0223(8) 0.0202(7) 0.0188(7) -0.0019(6) -0.0061(6) 0.0037(6) 
C10 0.0187(7) 0.0229(8) 0.0158(7) 0.0015(6) 0.0002(6) 0.0049(6) 
C11 0.0114(7) 0.0211(7) 0.0174(7) 0.0016(6) 0.0009(5) -0.0040(5) 
C12 0.0144(7) 0.0222(8) 0.0211(7) 0.0046(6) 0.0015(6) -0.0015(6) 
C13 0.0155(7) 0.0354(9) 0.0172(7) 0.0071(6) -0.0005(6) -0.0020(6) 
C14 0.0160(7) 0.0367(9) 0.0164(7) -0.0043(6) 0.0018(6) -0.0056(6) 
C15 0.0141(7) 0.0253(8) 0.0237(8) -0.0045(6) 0.0032(6) -0.0029(6) 
C16 0.0130(7) 0.0209(7) 0.0190(7) 0.0001(6) -0.0003(5) -0.0016(5) 
  
_geom_special_details 
; 
 All esds (except the esd in the dihedral angle between two l.s. planes) 
 are estimated using the full covariance matrix.  The cell esds are taken 
 into account individually in the estimation of esds in distances, angles 
 and torsion angles; correlations between esds in cell parameters are only 
 used when they are defined by crystal symmetry.  An approximate (isotropic) 
 treatment of cell esds is used for estimating esds involving l.s. planes. 
; 
  
loop_ 
 _geom_bond_atom_site_label_1 
 _geom_bond_atom_site_label_2 
 _geom_bond_distance 
 _geom_bond_site_symmetry_2 
 _geom_bond_publ_flag 
S1 C1 1.7332(14) . ? 
S1 C2 1.8414(14) . ? 
S2 C1 1.6748(14) . ? 
N1 C1 1.3434(18) . ? 
N1 C4 1.4193(18) . ? 
N1 H1N 0.875(19) . ? 
C2 C3 1.493(2) . ? 
C2 C5 1.520(2) . ? 
C2 H2 1.0000 . ? 
C3 C4 1.337(2) . ? 
C3 H3 0.9500 . ? 
C4 C11 1.480(2) . ? 
C5 C6 1.394(2) . ? 
C5 C10 1.396(2) . ? 
C6 C7 1.387(2) . ? 
C6 H6 0.9500 . ? 
C7 C8 1.386(2) . ? 
C7 H7 0.9500 . ? 
C8 C9 1.387(2) . ? 
C8 H8 0.9500 . ? 
C9 C10 1.384(2) . ? 
C9 H9 0.9500 . ? 
C10 H10 0.9500 . ? 
C11 C16 1.395(2) . ? 
C11 C12 1.403(2) . ? 
C12 C13 1.385(2) . ? 
C12 H12 0.9500 . ? 
C13 C14 1.389(2) . ? 
C13 H13 0.9500 . ? 
C14 C15 1.387(2) . ? 
C14 H14 0.9500 . ? 
C15 C16 1.388(2) . ? 
C15 H15 0.9500 . ? 
C16 H16 0.9500 . ? 
  
loop_ 
 _geom_angle_atom_site_label_1 
 _geom_angle_atom_site_label_2 
 _geom_angle_atom_site_label_3 
 _geom_angle 
 _geom_angle_site_symmetry_1 
 _geom_angle_site_symmetry_3 
 _geom_angle_publ_flag 
C1 S1 C2 100.76(7) . . ? 
C1 N1 C4 126.34(12) . . ? 
C1 N1 H1N 116.9(12) . . ? 
C4 N1 H1N 116.4(12) . . ? 
N1 C1 S2 123.69(11) . . ? 
N1 C1 S1 118.87(11) . . ? 
S2 C1 S1 117.38(8) . . ? 
C3 C2 C5 115.68(12) . . ? 
C3 C2 S1 108.61(10) . . ? 
C5 C2 S1 109.73(9) . . ? 
C3 C2 H2 107.5 . . ? 
C5 C2 H2 107.5 . . ? 
S1 C2 H2 107.5 . . ? 
C4 C3 C2 123.00(13) . . ? 
C4 C3 H3 118.5 . . ? 
C2 C3 H3 118.5 . . ? 
C3 C4 N1 120.84(13) . . ? 
C3 C4 C11 123.85(13) . . ? 
N1 C4 C11 115.31(12) . . ? 
C6 C5 C10 118.69(14) . . ? 
C6 C5 C2 121.91(13) . . ? 
C10 C5 C2 119.36(13) . . ? 
C7 C6 C5 120.48(14) . . ? 
C7 C6 H6 119.8 . . ? 
C5 C6 H6 119.8 . . ? 
C6 C7 C8 120.32(14) . . ? 
C6 C7 H7 119.8 . . ? 
C8 C7 H7 119.8 . . ? 
C9 C8 C7 119.63(14) . . ? 
C9 C8 H8 120.2 . . ? 
C7 C8 H8 120.2 . . ? 
C10 C9 C8 120.17(14) . . ? 
C10 C9 H9 119.9 . . ? 
C8 C9 H9 119.9 . . ? 
C9 C10 C5 120.69(14) . . ? 
C9 C10 H10 119.7 . . ? 
C5 C10 H10 119.7 . . ? 
C16 C11 C12 118.63(13) . . ? 
C16 C11 C4 121.39(13) . . ? 
C12 C11 C4 119.97(13) . . ? 
C13 C12 C11 120.49(14) . . ? 
C13 C12 H12 119.8 . . ? 
C11 C12 H12 119.8 . . ? 
C12 C13 C14 120.13(14) . . ? 
C12 C13 H13 119.9 . . ? 
C14 C13 H13 119.9 . . ? 
C15 C14 C13 120.01(14) . . ? 
C15 C14 H14 120.0 . . ? 
C13 C14 H14 120.0 . . ? 
C14 C15 C16 119.91(15) . . ? 
C14 C15 H15 120.0 . . ? 
C16 C15 H15 120.0 . . ? 
C15 C16 C11 120.80(14) . . ? 
C15 C16 H16 119.6 . . ? 
C11 C16 H16 119.6 . . ? 
  
loop_ 
 _geom_torsion_atom_site_label_1 
 _geom_torsion_atom_site_label_2 
 _geom_torsion_atom_site_label_3 
 _geom_torsion_atom_site_label_4 
 _geom_torsion 
 _geom_torsion_site_symmetry_1 
 _geom_torsion_site_symmetry_2 
 _geom_torsion_site_symmetry_3 
 _geom_torsion_site_symmetry_4 
 _geom_torsion_publ_flag 
C4 N1 C1 S2 171.26(11) . . . . ? 
C4 N1 C1 S1 -6.0(2) . . . . ? 
C2 S1 C1 N1 -27.24(12) . . . . ? 
C2 S1 C1 S2 155.32(8) . . . . ? 
C1 S1 C2 C3 47.34(11) . . . . ? 
C1 S1 C2 C5 -79.99(10) . . . . ? 
C5 C2 C3 C4 81.74(17) . . . . ? 
S1 C2 C3 C4 -42.12(17) . . . . ? 
C2 C3 C4 N1 6.6(2) . . . . ? 
C2 C3 C4 C11 -173.55(13) . . . . ? 
C1 N1 C4 C3 22.8(2) . . . . ? 
C1 N1 C4 C11 -157.05(13) . . . . ? 
C3 C2 C5 C6 -15.31(19) . . . . ? 
S1 C2 C5 C6 107.96(14) . . . . ? 
C3 C2 C5 C10 166.94(13) . . . . ? 
S1 C2 C5 C10 -69.79(15) . . . . ? 
C10 C5 C6 C7 1.2(2) . . . . ? 
C2 C5 C6 C7 -176.53(14) . . . . ? 
C5 C6 C7 C8 -0.8(2) . . . . ? 
C6 C7 C8 C9 -0.4(2) . . . . ? 
C7 C8 C9 C10 1.1(2) . . . . ? 
C8 C9 C10 C5 -0.6(2) . . . . ? 
C6 C5 C10 C9 -0.5(2) . . . . ? 
C2 C5 C10 C9 177.29(13) . . . . ? 
C3 C4 C11 C16 -143.61(15) . . . . ? 
N1 C4 C11 C16 36.24(18) . . . . ? 
C3 C4 C11 C12 35.4(2) . . . . ? 
N1 C4 C11 C12 -144.76(13) . . . . ? 
C16 C11 C12 C13 1.1(2) . . . . ? 
C4 C11 C12 C13 -177.89(13) . . . . ? 
C11 C12 C13 C14 -1.5(2) . . . . ? 
C12 C13 C14 C15 0.4(2) . . . . ? 
C13 C14 C15 C16 1.0(2) . . . . ? 
C14 C15 C16 C11 -1.4(2) . . . . ? 
C12 C11 C16 C15 0.3(2) . . . . ? 
C4 C11 C16 C15 179.35(13) . . . . ? 
  
loop_ 
 _geom_hbond_atom_site_label_D 
 _geom_hbond_atom_site_label_H 
 _geom_hbond_atom_site_label_A 
 _geom_hbond_distance_DH 
 _geom_hbond_distance_HA 
 _geom_hbond_distance_DA 
 _geom_hbond_angle_DHA 
 _geom_hbond_site_symmetry_A 
N1 H1N S2  0.875(19) 2.571(19) 3.4444(13) 176.4(15) 3_767 
  
_diffrn_measured_fraction_theta_max    0.995 
_diffrn_reflns_theta_full              26.44 
_diffrn_measured_fraction_theta_full   0.995 
_refine_diff_density_max    0.353 
_refine_diff_density_min   -0.176 
_refine_diff_density_rms    0.052 
